# Supplementary material for: Barriers and facilitators for increased accessibility to quality rehabilitation services in low- and middle- income countries: a systematic review
Source: PubMed Central journal article supplement — Eur J Phys Rehabil Med. 2024 Mar 29;60(3):514–22. doi: 10.23736/S1973-9087.24.08154-1 (PMC11258907; doi:10.23736/s1973-9087.24.08154-1), 2024-03-29
Supplement: Supplementary_Digital_Material1.pdf [file Supplementary_Digital_Material1.pdf]

## SUPPLEMENTARY DIGITAL MATERIAL 1

Supplementary Table I.—Summary of the search strategy.

Databases searched: Medline (PubMed), Scopus, and Web of Science

Database Host: National Library of Medicine, Elsevier, Clarivate Analytics

Date of search: 25<sup>th</sup> April 2021 (PubMed), 3<sup>rd</sup> May 2021 (Scopus and Web of Science)

Years covered by search: No restrictions

Restrictions: Restricted to English language and human studies. Exclusion of papers from HIC.

Keyword strategies: Boolean search

| Main Keywords           | Possible synonyms applied                                                                                                                                                       |
|-------------------------|---------------------------------------------------------------------------------------------------------------------------------------------------------------------------------|
| Rehabilitation services | “Rehabilitation Servi*”, “Rehabilitation clinic*”, Rehabilitation ward*”, Physiotherap*, Occupational therap*, “Speech therap*, Prostheti*, Orthoti*, “CommunityRehabilitation” |
| Organization-           | Organiz*, Government*, Private, Public, NGO*                                                                                                                                    |
| Barriers-               | Obstacle*, Difficult*, Barrier*                                                                                                                                                 |
| Facilitators            | Facilit*, Support*                                                                                                                                                              |
| LMIC                    | “Low middle income countr*”, “poor countr*”, “developing countr*, “low resource countr*”, “Middle income countr*”, “Asian countr*”, “African countr*”                           |

Complete search strategy:

|                              |                                                                                                                                                                                                                                                                                                                                                                                                                                                                                                                                                                                                                                                                                                        |
|------------------------------|--------------------------------------------------------------------------------------------------------------------------------------------------------------------------------------------------------------------------------------------------------------------------------------------------------------------------------------------------------------------------------------------------------------------------------------------------------------------------------------------------------------------------------------------------------------------------------------------------------------------------------------------------------------------------------------------------------|
| <p>Medline<br/>(NLM)</p>     | <p>((((((((((("low income countr*") OR ("middle income countr*")) OR ("low middle income countr*")) OR (low middle income countr*) OR ("poor countr*")) OR ("developing countr*")) OR ("low resource countr*")) OR ("middle income countr*")) OR ("Asian countr*")) OR ("African countr*")) AND ((facilit* OR support*)) AND (((obstacle* OR barrier*) OR (difficult*))) AND (((((((organiz* OR (organis*) OR (goverment*) OR (private)) OR (public))) OR (NGO*))) AND (((((((("rehabilitation servi*") OR ("rehabilitation clinic*")) OR ("rehabilitation ward*")) OR (physiotherap*) OR ("ocupational therap*")) OR ("speech therap*")) OR (prosthe*) OR (ortho*)) OR ("community rehabilita*"))</p> |
| <p>Scopus<br/>(Elsevier)</p> | <p>((TITLE-ABS-KEY(facilit*) OR TITLE-ABS-KEY(support*)) AND ((TITLE-ABS-KEY(obstacle*) OR TITLE-ABS-KEY(difficult*) OR TITLE-ABS-KEY(barrier*))) AND ((TITLE-ABS-KEY("low middle income countr*") OR TITLE-ABS-KEY("poor countr*") OR TITLE-ABS-KEY("developing countr*") OR TITLE-ABS-KEY("low resource countr*") OR TITLE-ABS-KEY("middle income countr*") OR TITLE-ABS-KEY("asian countr*") OR TITLE-ABS-KEY("african countr*")) AND ((TITLE-ABS-KEY(organiz*) OR TITLE-ABS-KEY(goverment*) OR TITLE-ABS-KEY(private*) OR TITLE-ABS-KEY(public*) OR TITLE-ABS-KEY(NGO*))) AND ((TITLE-ABS-KEY("rehabilitation serv*") OR TITLE-ABS-KEY("rehabilitation clinic*") OR TITLE-ABS-</p>                 |

|                                             |                                                                                                                                                                                                                                                                                                                                                                                                                                                                                                                                                                                                                                                           |
|---------------------------------------------|-----------------------------------------------------------------------------------------------------------------------------------------------------------------------------------------------------------------------------------------------------------------------------------------------------------------------------------------------------------------------------------------------------------------------------------------------------------------------------------------------------------------------------------------------------------------------------------------------------------------------------------------------------------|
|                                             | <p>KEY("rehabilitation ward*") OR TITLE-ABS-KEY(physiotherap*) OR TITLE-ABS-KEY("occupational therap*") OR TITLE-ABS-KEY("speech therap*") OR TITLE-ABS-KEY(prostheti*) OR TITLE-ABS-KEY(orthoti*) OR TITLE-ABS-KEY("community rehabilitation*"))</p>                                                                                                                                                                                                                                                                                                                                                                                                     |
| <p>Web of Science (Clarivate Analytics)</p> | <p>(TS=("Low middle income countr*") OR TS=("African countr*") OR TS=("poor countr*") OR TS=("developing countr*") OR TS=("low resource countr*") OR TS=("Middle income countr*") OR TS=("Asian countr*")) AND (TS=("Rehabilitation Servi*") OR TS=("Rehabilitation clinic*") OR TS=("Rehabilitation ward*") OR TS=(Physiotherap*) OR TS=("Occupational therap*") OR TS=("Speech therap*") OR TS=(Prostheti*) OR TS=(Orthoti*) OR TS=("Community Rehabilitation*")) AND (TS=(Organiz*) OR TS=(Government*) OR TS=(Private) OR TS=(Public) OR TS=(NGO*)) AND (TS=(Obstacle*) OR TS=(Difficult*) OR TS=(Barrier*)) AND (TS=(Facilit*) OR TS=(Support*))</p> |
